# Supplementary material
Source: publisher site journal article supplement (https://www.dovepress.com/article/417863)
Supplement: Supplementary file 1 [file get_supplementary_file.php]

Supplementary

**Table 1** Baseline characteristics of all 245 patients classified by survival

| Characteristics | Survivors (N=194) | Deaths (N=51) | P-value |
| --- | --- | --- | --- |
| Male sex (%) | 118 (60.8) | 31 (60.8) | .996 |
| Age (median +/- IQR) | 75.0 (64.8 – 83.0) | 76.0 (70.0 – 88.0) | .095 |
| BMI (median +/- IQR) | 20.9 (17.8 – 23.8) | 21.8 (18.2 – 23.8) | .787 |
| Current/former smoker (%) | 59 (39.6) | 11 (35.5) | .669 |
| Patient’s status   - Bedridden - Tube feeding - Tracheostomy - Home oxygen | 75 (38.7)  56 (28.9)  33 (17.0)  15 (7.7) | 18 (36.0)  11 (22.0)  5 (10.0)  2 (4.0) | .730  .332  .223  .335 |
| Medical conditions (%)   - Hypertension - Neurological diseasesa - Diabetes mellitus - Non-dialysis CKD - Asthma or COPD - Congestive heart failure - Dyslipidemia - Solid organ malignancy - Dialysis CKD | 91 (46.9)  73 (37.6)  64 (33.0)  37 (19.1)  38 (19.6)  24 (12.4)  23 (11.9)  18 (9.3)  5 (2.6) | 27 (52.9)  18 (35.3)  22 (43.1)  9 (17.6)  7 (13.7)  15 (29.4)  4 (7.8)  7 (13.7)  3 (5.9) | .443  .759  .177  .817  .336  .003  .415  .351  .237 |
| Receiving systemic corticosteroid or immunosuppressantb (%) | 45 (23.2) | 14 (27.5) | .527 |
| History of pneumonia (%) | 73 (38.8) | 28 (54.9) | .039 |
| Recently hospitalized more than 48 hours (%)   - Within 1 month - Between 1 to 3 months - Between 3 to 12 months - More than 12 months or never | 67 (34.7)  26 (13.5)  28 (14.5)  72 (37.3) | 24 (47.1)  6 (11.8)  4 (7.8)  17 (33.3) | .216 |
| Received IV antibiotics more than 5 days (%)   - Within 1 month - Between 1 to 3 months - Between 3 to 12 months - More than 12 months or never | 40 (21.1)  21 (11.1)  29 (15.3)  100 (52.6) | 19 (37.3)  8 (15.7)  4 (7.8)  20 (39.2) | .020 |
| Received oral antibiotics more than 7 days (%)   - Within 1 month - Between 1 to 3 months - Between 3 to 12 months - More than 12 months or never | 22 (11.7)  10 (5.3)  20 (10.6)  136 (72.3) | 5 (9.8)  2 (3.9)  3 (5.9)  41 (80.4) | .423 |
| EB colonization (%)   - Any site   - Respiratory tract   - Outside respiratory tract | 72 (37.5)  55 (28.6)  36 (18.8) | 30 (58.8)  21 (41.2)  13 (25.5) | .006  .086  .286 |
| MDR EB colonization (%) | 40 (20.8) | 16 (31.4) | .112 |
| Symptom duration (days, median +/- IQR) | 2.0 (1.0 – 3.0) | 2.0 (1.0 – 3.0) | .456 |
| Clinical presentation (median +/- IQR)   - BT (Celsius degree) - RR (tpm) - SBP (mmHg) | 37.8 (36.9 – 38.4)  26.0 (22.0 – 32.0)  120.0 (110.0 – 140.0) | 37.0 (36.3 – 38.2)  26.0 (24.0 – 28.0)  110.0 (86.0 – 131.0) | .013  .803  .001 |
| Laboratory at presentation   - Mean hematocrit (%, SD) - Median WBC (cell/mm3, IQR) - Mean PF ratio (SD) - Median BUN (mg/dL, IQR) - Median serum sodium (mEq/L, IQR) | 33.9 (7.5)  10,550  (7,915 – 14,600)  271.8 (109.4)  22.3 (13.3 – 34.6)  134.0 (130.0 – 139.0) | 31.0 (7.6)  11,000  (6,900 -18,100)  224.4 (108.5)  38.3 (24.3 – 64.1)  133.0 (127.0 – 139.0) | .014  .657  .025  <.001  .616 |
| Lobar consolidation on chest X-ray (%) | 61 (31.4) | 22 (43.1) | .116 |
| Bacteremia (%) | 23 (11.9) | 11 (21.6) | .074 |
| Severe CAP (%)   - Required mechanical ventilator support (%) - Required vasopressor (%) | 94 (48.5)  85 (48.3)  46 (23.7) | 38 (74.5)  36 (70.6)  27 (52.9) | <.001  <.001    <.001 |
| Appropriated empirical antibiotic(s) (%) | 98 (50.8) | 18 (35.3) | .049 |
| Ineffective empirical antibiotic(s) (%) | 41 (21.1) | 12 (23.5) | .725 |
| MDR EB-CAP (%) | 76 (39.2) | 24 (47.1) | .308 |
| ICU or Semi-ICU admission (%) | 99 (51.0) | 36 (70.6) | .012 |

**Note:** aFor example, Parkinson's disease, cerebrovascular accident, and others; bIncluded currently use of any dose of systemic corticosteroids

**Abbreviations:** BMI: body mass index, BT: body temperature, BUN: blood urea nitrogen, CAP: community acquired pneumonia, CKD: chronic kidney disease, COPD: **chronic obstructive pulmonary disease**, EB: Enterobacterales, ICU: intensive care unit, IQR: interquartile range, IV: intravenous, MDR: multidrug resistant, PF ratio: PaO2/FiO2, RR: respiratory rate, SBP: systolic blood pressure, tpm: times per minute, WBC: white blood cell

**Table 2** Factors associated with in hospital mortality (multivariate analysis) when adjusted for severe CAP, congestive heart failure, EB colonization at any site, and BUN >30 mg/dL

| Factors | aOR (95%CI) | P-value |
| --- | --- | --- |
| Severe CAP | 2.70 (1.27 – 5.73) | .010 |
| Congestive heart failure | 1.90 (0.85 – 4.25) | .117 |
| EB colonization at any site | 2.46 (1.24 – 4.87) | .010 |
| BUN >30 mg/dL | 3.03 (1.50 – 6.15) | .002 |

**Abbreviations:** 95%CI: 95% confidential interval, aOR: adjusted odd ratio, BUN: blood urea nitrogen, CAP: crude odd ratio, EB: Enterobacterales

**Table 3** Distribution of pathogens and antimicrobial susceptibility of 3GCR EB to commonly used antibiotics

| Pathogens | Total isolate (N=281, %) | MDR isolate  (N=100, %) | Antimicrobial susceptible isolates in 3GCR EB (N, %) | | | | |
| --- | --- | --- | --- | --- | --- | --- | --- |
| TZP  (N=96) | MEM  (N=100) | LVX (N=77) | AMK  (N=100) | SXT (N=100) |
| *K. pneumoniae* | 180 (64.1) | 58 (58.0) | 17 (30.9) | 43 (74.1) | 7 (16.7) | 55 (94.8) | 8 (13.8) |
| ***E. coli*** | 63 (22.4) | 32 (32.0) | 25 (80.6) | 30 (93.8) | 4 (14.8) | 30 (93.8) | 9 (28.1) |
| ***Enterobacter* spp.** | 19 (6.8) | 4 (4.0) | 1 (25.0) | 3 (75.0) | 1 (50.0) | 3 (75.0) | 0 (0.0) |
| ***Proteus* spp.** | 13 (4.6) | 6 (6.0) | 5 (83.3) | 6 (100.0) | 2 (33.0) | 6 (100.0) | 2 (33.3) |
| **Others*** | 6 (2.1) | 0 (0.0) | NA | NA | NA | NA | NA |

**Note:** *Referral to other gram-negative bacteria, including ***Providencia rettgeri***, *Citrobacter diversus*, and *Serratia marcescens*

Green labeled: percentage of susceptible isolates within the genus to the testing antibiotic was above 80%

Yellow labeled: percentage of susceptible isolates within the genus to the testing antibiotic was above 50 - 80%

Red labeled: percentage of susceptible isolates within the genus to the testing antibiotic was below 50%

**Abbreviations:** AMK: amikacin, 3GCR EB: Third generation cephalosporin resistant

Enterobacterales, ***E. coli*: *Escherichia coli***, *K. pneumoniae*: *Klebsiella pneumoniae,* LVX: levofloxacin, MDR: *Multidrug resistant*, MEM: meropenem, NA: Not applicable, SXT: Trimethoprim-sulfamethoxazole, TZP: piperacillin/tazobactam
